# Supplementary material
Source: Springer Nature journal article supplement (https://www.springermedizin.de/resource/supplementary/13075_2009_2741_MOESM1_ESM.pdf/9692778)
Supplement: MOESM1 [file 9692778]

Enrollment

Assessed for eligibility (n=1252)

Excluded (n=469)

- Inclusion/exclusion criteria (n=416)
- Refused to participate (n=53)

Randomized (n=783)

Diclofenac  
Sodium 1% Gel

Vehicle

Allocation

Allocated to receive diclofenac sodium 1% gel (n=400)  
Received allocated intervention (n=400)

Allocated to receive vehicle gel (n=383)  
Received allocated intervention (n=383)

Follow-up

Completed treatment (n=354)  
Discontinued treatment (n=46)  
    Adverse events (n=19)  
    Lack of efficacy (n=11)  
    Withdrew consent (n=8)  
    Other (n=8)

Completed treatment (n=347)  
Discontinued treatment (n=36)  
    Lack of efficacy (n=17)  
    Adverse events (n=9)  
    Withdrew consent (n=7)  
    Other (n=3)

Primary  
Analysis

Evaluated for efficacy (n=400)

Evaluated for efficacy (n=383)

Post Hoc  
Analysis

Population for pooled analysis (n=783)
